# Supplementary material for: Comparison of the Biological Potential and Chemical Composition of Brazilian and Mexican Propolis
Source: MDPI journal article supplement (doi:10.3390/app112311417), 2021-12-02
Supplement: s1 [file s1]

## Supplementary Materials

Table S1. Chemical composition of Mexican propolis

| Region | Botanical Source                                                                                                                                                                                               | Color        | Compounds                                                                                                                                                                                                                             | Analytical method | Cite |
|--------|----------------------------------------------------------------------------------------------------------------------------------------------------------------------------------------------------------------|--------------|---------------------------------------------------------------------------------------------------------------------------------------------------------------------------------------------------------------------------------------|-------------------|------|
| South  | <i>Dalbergia species</i>                                                                                                                                                                                       | Red propolis | (-)-7-hydroxyflavanone, (p)-pinocembrin, (-)-mucronulatol, (-)-arizonicanol A, (p)-vestitol, (-)-melilotocarpan A and (-)-melilotocarpan D                                                                                            | RP-HPLC           | [52] |
|        | <i>Bursera simaruba</i>                                                                                                                                                                                        |              | $\alpha$ -amyrenone, $\alpha$ -amyrin acetate III, $\alpha$ -amyrin IV, $\beta$ -amyrenone II, $\beta$ amyrin V, Fucosterol VI, $\beta/\gamma$ -sitosterol VII/VIII                                                                   | HPLC<br>GC-MS     | [53] |
|        | <i>Bursera simaruba</i> (L.) Sarg, <i>Dalbergia glabra</i> , <i>Cordia alliodora</i> , <i>Cardiospermum haliacacabum</i> , <i>Dombeya wallichii</i> , <i>Antigonum leptopus</i> , <i>Sapindus saponaria</i> *1 |              | Epoxy-pinocembrin chalcone, $\epsilon$ -caprolactone derivative, Pinostrobin, Pinocembrin, Izalpinin, Kaempferol, Rhamnetin, Dymethylallyl caffeate, Isopent-3-enyl caffeate, Cinnamic acid, 3,4 Dimethoxycinnamic acid, Caffeic acid | EIMS<br>HPLC      | [54] |
|        | <i>Bursera simaruba</i>                                                                                                                                                                                        | N/E          | Triterpenoids mangiferolic acid, iso-mangiferolic acid, and dammarenediol II                                                                                                                                                          | GC-MS             | [74] |

|        |     |                           |                                                                                                                                                                                               |                     |       |
|--------|-----|---------------------------|-----------------------------------------------------------------------------------------------------------------------------------------------------------------------------------------------|---------------------|-------|
| Center | N/E | Brown/<br>green<br>yellow | Pinocembrin, Tectocrisine, Borneol, Cardamonin, Sakuranetina, Taraxasterol, Vaccenic acid, Ethyl palmitate, 1-(3-aminopropyl) azaciclotridecan-2-ona                                          | CG-EM               | [86]  |
|        |     |                           | Esclareno, Cardamonin, Pinocembrin, Aromadendrene, Ethyl ester of oleic acid, Eicosano                                                                                                        |                     |       |
|        |     |                           | Geranilgeraniol, Lupeol, Lupenone, $\alpha$ -Amirin, Vaccenic acid, Oleic acid                                                                                                                |                     |       |
|        |     |                           | 12-Oleaneno, Cicloartenol, 4,8 a-Dimetil-6-(1-metiletenil) 3,5,6,7,8,8ahexahidro-2(1H)-naftalenona, Escualeno                                                                                 |                     |       |
|        |     |                           | Selinene, Lauric acid, Palmitic acid, Aromadendrene                                                                                                                                           |                     |       |
|        | N/E | Brown                     | Pinocembrin, chrysin, galangin, alpinetin, 5-methyl-pinobanksin ether, dillenetin, isorhamnetin, 5-methylgalangin ether, 5-methylchrysin ether, ferulic acid, syringic acid, and caffeic acid | HS-SPME), GC-MS     | [82]  |
| North  | N/E | N/E                       | Naringin, Naringenin, Kaempferol, Quercetin, Acacetin, Luteolin, Pinocembrin Chrysin                                                                                                          | HPLC-DAD<br>HPLC-MS | [40]  |
|        |     | Brown                     | Alpinone, pinostrobin, galangin-5-methylethe, and kaempferide                                                                                                                                 |                     | [187] |

|                                                                                                                                                                |                   |  |                                                                                                                                                                                                                                                                            |                                        |       |
|----------------------------------------------------------------------------------------------------------------------------------------------------------------|-------------------|--|----------------------------------------------------------------------------------------------------------------------------------------------------------------------------------------------------------------------------------------------------------------------------|----------------------------------------|-------|
|                                                                                                                                                                |                   |  | Pinocembrin, pinobanksin, and chrysin                                                                                                                                                                                                                                      | Vacuum liquid chromatography (VLC)     |       |
|                                                                                                                                                                |                   |  | Pinocembrin, isorhamnetin, pinobanksin-5-methylether, alpinetin.                                                                                                                                                                                                           |                                        |       |
| <i>Encelia farinosa</i>                                                                                                                                        |                   |  | Pinocembrin, Xantomicrol, Chrysin, Galangine                                                                                                                                                                                                                               | HPLC                                   | [188] |
|                                                                                                                                                                | N/E               |  | (2R,3R)-3,5-dihydroxy-7-methoxyflavanone, 3-(2-methyl)butyrate, (7''R)-8-[1-(4'-hydroxy-3'-methoxyphenyl)prop-2-en-1-yl]galangin                                                                                                                                           | MPLC                                   | [138] |
| <i>Encelia farinosa</i> ,<br><i>Ambrosia deltoidea</i> ,<br><i>Ambrosia ambrosioides</i> ,<br><i>Bursera laxiflora</i> , <i>Populus fremontii</i><br>S.Watson* | N/E               |  | 8-[1-(4-hydroxy-3-methoxyphenyl)prop-2-en-1-yl] galangin, 8-[1-(4-hydroxy-3-methoxyphenyl) prop-2-en-1-yl] chrysin, (2R,3R)-6-[1-(4_-hydroxy-3-methoxyphenyl) prop-2-en-1-yl] pinobanksin, (2R,3R)-6-[1-(4_-hydroxy-3-methoxyphenyl) prop-2-en-1-yl] pinobanksin 3-acetate | FAB-MS<br>HR-FAB-MS<br>RP-MPLC<br>HPLC | [41]  |
|                                                                                                                                                                | Brown-green-Ochre |  | Pinocembrin, Pinobanksin 3-acetate, CAPE, Chrysin, Galangin, Acacetin                                                                                                                                                                                                      | HPLC                                   | [55]  |
|                                                                                                                                                                | N/E               |  | Chrysin, Caffeic acid phenethyl ester, Pinocembrin, Hesperetin, Naringenin, Rutin                                                                                                                                                                                          | HPLC-DAD                               | [140] |
| <i>Mesquite (Prosopis) and catclaw (Acacia greggii)</i>                                                                                                        | N/E               |  | Gallic acid, cinnamic acid, <i>p</i> -coumaric acid, naringenin, quercetin, luteolin, kaempferol, apigenin, pinocembrin,                                                                                                                                                   | HPLC-DAD                               | [81]  |

|  |  |  |                                                                           |  |  |
|--|--|--|---------------------------------------------------------------------------|--|--|
|  |  |  | pinobanksin 3-acetate, CAPE, chrysin, galangin, acacetin, and pinostrobin |  |  |
|--|--|--|---------------------------------------------------------------------------|--|--|

Table S2. Chemical composition of Brazilian propolis

| Region | Botanical Source                | Type         | Compounds/ Chemical Markers                                                                                                                                                                                                                                                                                                                                                                                                                                                                                                                   | Analytical method                  | Cite |
|--------|---------------------------------|--------------|-----------------------------------------------------------------------------------------------------------------------------------------------------------------------------------------------------------------------------------------------------------------------------------------------------------------------------------------------------------------------------------------------------------------------------------------------------------------------------------------------------------------------------------------------|------------------------------------|------|
| NE     | <i>Dalbergia ecastophylulun</i> | Red propolis | 3-Hydroxy-8-9-dimethoxypterocarpan<br>Formononetin                                                                                                                                                                                                                                                                                                                                                                                                                                                                                            | HPLC                               | [48] |
|        |                                 |              | Caffeic acid, Ferulic acid, Umbelic acid, p-coumaric acid, 7-O-beta-glucopyranosyl-4'-hydroxy-5-methoxyisoflavone, 6-Methoxyluteolin 7-rhamnoside, Genistein, Kaempferol, Cathechin, Dalbergioidin, Epicatechin, Daidzein, Liquiritigenin, 2'-Hydroxyformononetin, Evernic acid, Narigenin, Pinobanksin, Calycosin, Quercetin, Retusapurpurin A and B, Isoliquiritigenin, Formononetin / Isoformononetin, 4,4'-dihydroxy-2-methoxychalcon, (7S)-dalbergiphenol, Vestitol, Pinostrobin, Medicarpin, 2',6'-dihydroxy-4'-methoxydihydrochalcone, | LC-DAD-UV and LC-ESI-Orbitrap-FTMS | [37] |

|                                        |                |  |                                                                                                                                                                                                                                                                                                                                                                                                                                                                    |      |      |
|----------------------------------------|----------------|--|--------------------------------------------------------------------------------------------------------------------------------------------------------------------------------------------------------------------------------------------------------------------------------------------------------------------------------------------------------------------------------------------------------------------------------------------------------------------|------|------|
|                                        |                |  | Thevetiaflavone, Biochanin A, Chrysin, Pinocembrin, 3',4'-di-O-benzyl-7-O-(2-hydroxyethyl)-3-Omethylquercetin, (3S)-7-O-methylvestitol, 7,3'-Dihydroxy-4'-methoxy-8-methylflavane, Cycloartenol / $\alpha$ -amyrin / $\beta$ -amyrin, Hyperibone H, 16-hydroxiguttiferone K, Rhuschalcone V, Guttiferone F, Xanthochymol, Guttiferone E, Anacardic acid (6-pentadecylsalicylic acid), Makassaric acid, Guttiferone B,C and D, 19-nor-10-keto-25-hydroxyvitamin D3. |      |      |
|                                        |                |  | Trans feluric acid                                                                                                                                                                                                                                                                                                                                                                                                                                                 | HPLC | [35] |
| <i>Baccharis dracunculifolia</i>       | Green Propolis |  | Artepin C (3,5-diprenyl-4-hydroxycinnamic acid)                                                                                                                                                                                                                                                                                                                                                                                                                    | HPLC | [42] |
|                                        |                |  | Chatequin, Trans feluric acid, lutenoin                                                                                                                                                                                                                                                                                                                                                                                                                            | HPLC | [35] |
| poplar tree, <i>B. dracunculifolia</i> | Brown Propolis |  | pinobanksin, pinocembrin, pinobanksin 3-acetate, chrysin, and galangin                                                                                                                                                                                                                                                                                                                                                                                             | HPLC | [44] |
| <i>Copaifera sp.</i>                   |                |  | Chatequin, Trans feluric acid, lutenoin                                                                                                                                                                                                                                                                                                                                                                                                                            | HPLC | [35] |
